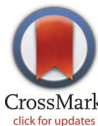

## Correction

# Correction: How Art Changes Your Brain: Differential Effects of Visual Art Production and Cognitive Art Evaluation on Functional Brain Connectivity

## The PLOS ONE Staff

Table S2, Table S3, and Table S4 are incorrect. Please view the correct Supporting Information tables below.

## Supporting Information

### Table S2. Regions of functional connectivity depicted in Fig. 2.

(DOC)

### Table S3. Regions of functional connectivity at rest depicted in Fig. 3.

(DOC)

### Table S4. Correlation between functional connectivity and resilience depicted in Fig. 4.

(DOC)

## Reference

1. Bolwerk A, Mack-Andrick J, Lang FR, Dörfler A, Maihöfner C (2014) How Art Changes Your Brain: Differential Effects of Visual Art Production and Cognitive Art Evaluation on Functional Brain Connectivity. PLoS ONE 9(7): e101035. doi:10.1371/journal.pone.0101035

**Citation:** The PLOS ONE Staff (2014) Correction: How Art Changes Your Brain: Differential Effects of Visual Art Production and Cognitive Art Evaluation on Functional Brain Connectivity. PLoS ONE 9(12): e116548. doi:10.1371/journal.pone.0116548

**Published:** December 22, 2014

**Copyright:** © 2014 The PLOS ONE Staff. This is an open-access article distributed under the terms of the Creative Commons Attribution License, which permits unrestricted use, distribution, and reproduction in any medium, provided the original author and source are credited.
